# Supplementary material for: DNA Damage Signalling and Repair Inhibitors: The Long-Sought-After Achilles’ Heel of Cancer
Source: MDPI journal article supplement (doi:10.3390/biom5043204), 2015-11-20
Supplement: s1 [file s1]

## Supplementary Material

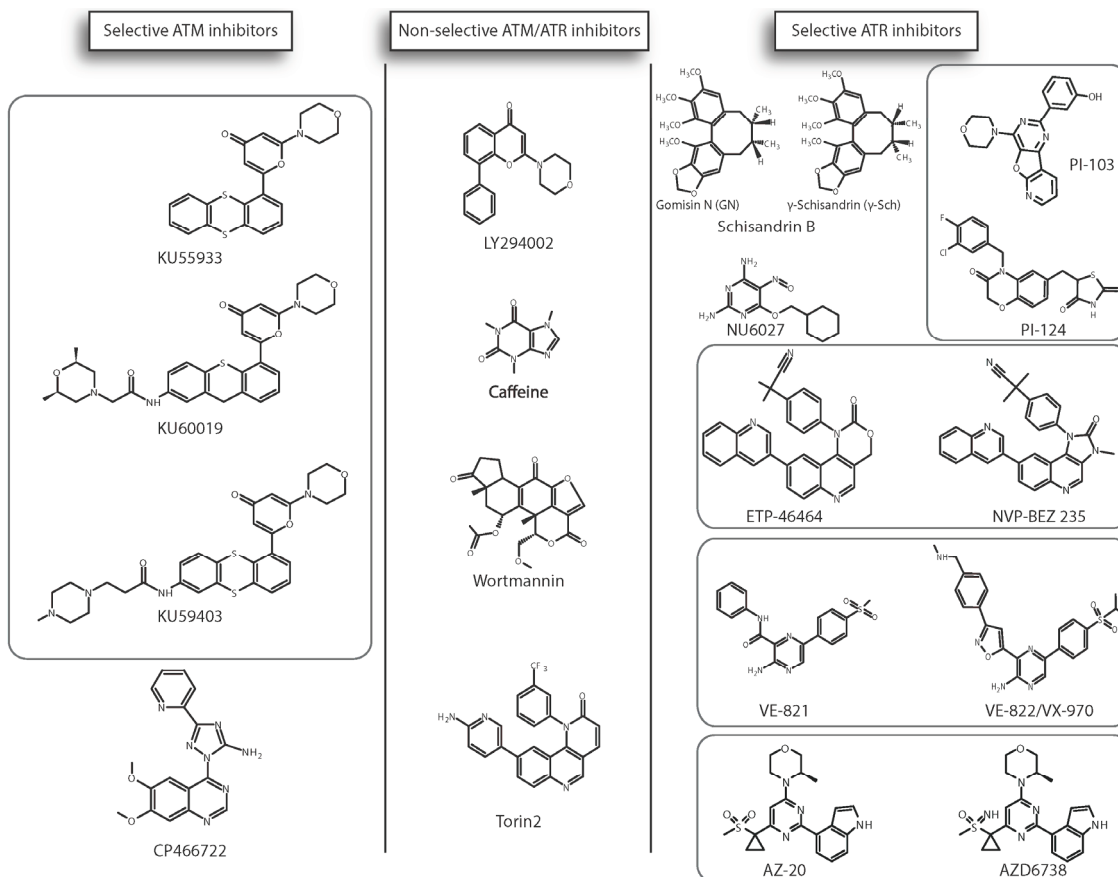

**Figure S1.** Selective ATM inhibitors (**left**), non-selective ATM/ATR inhibitors (**center**) and selective ATR inhibitors (**right**). Skeletal representation of the inhibitors. Grey boxes designate molecules sharing similarities.

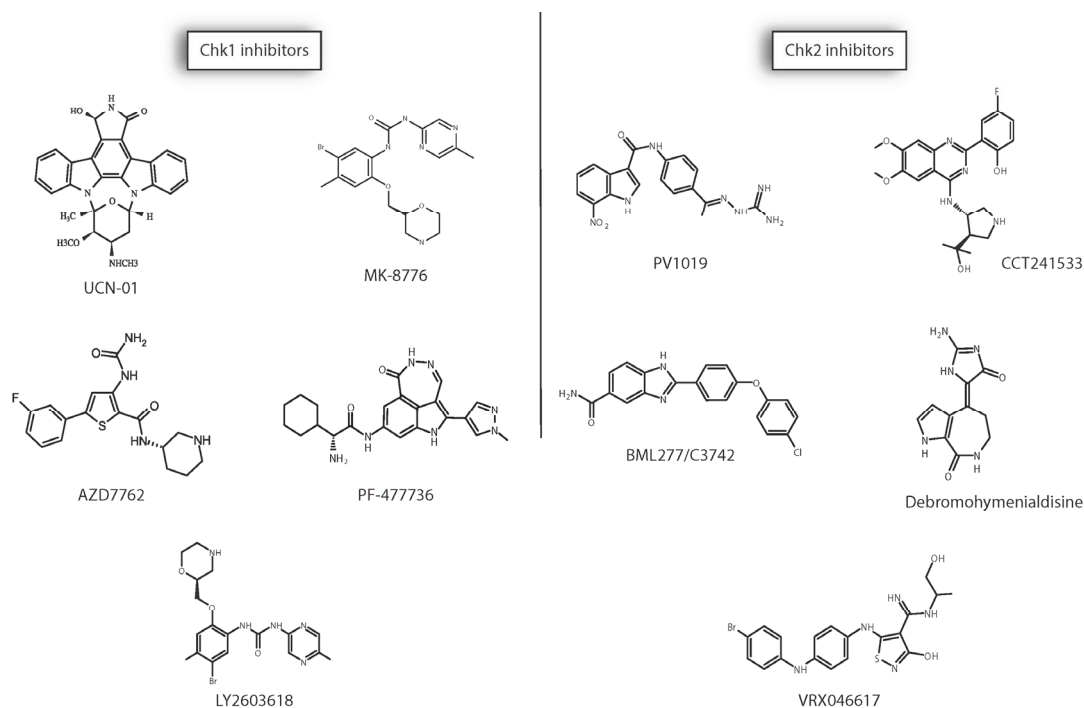

**Figure S2.** Chk1 inhibitors (**left**) and Chk2 inhibitors (**right**). Skeletal representation of inhibitors.

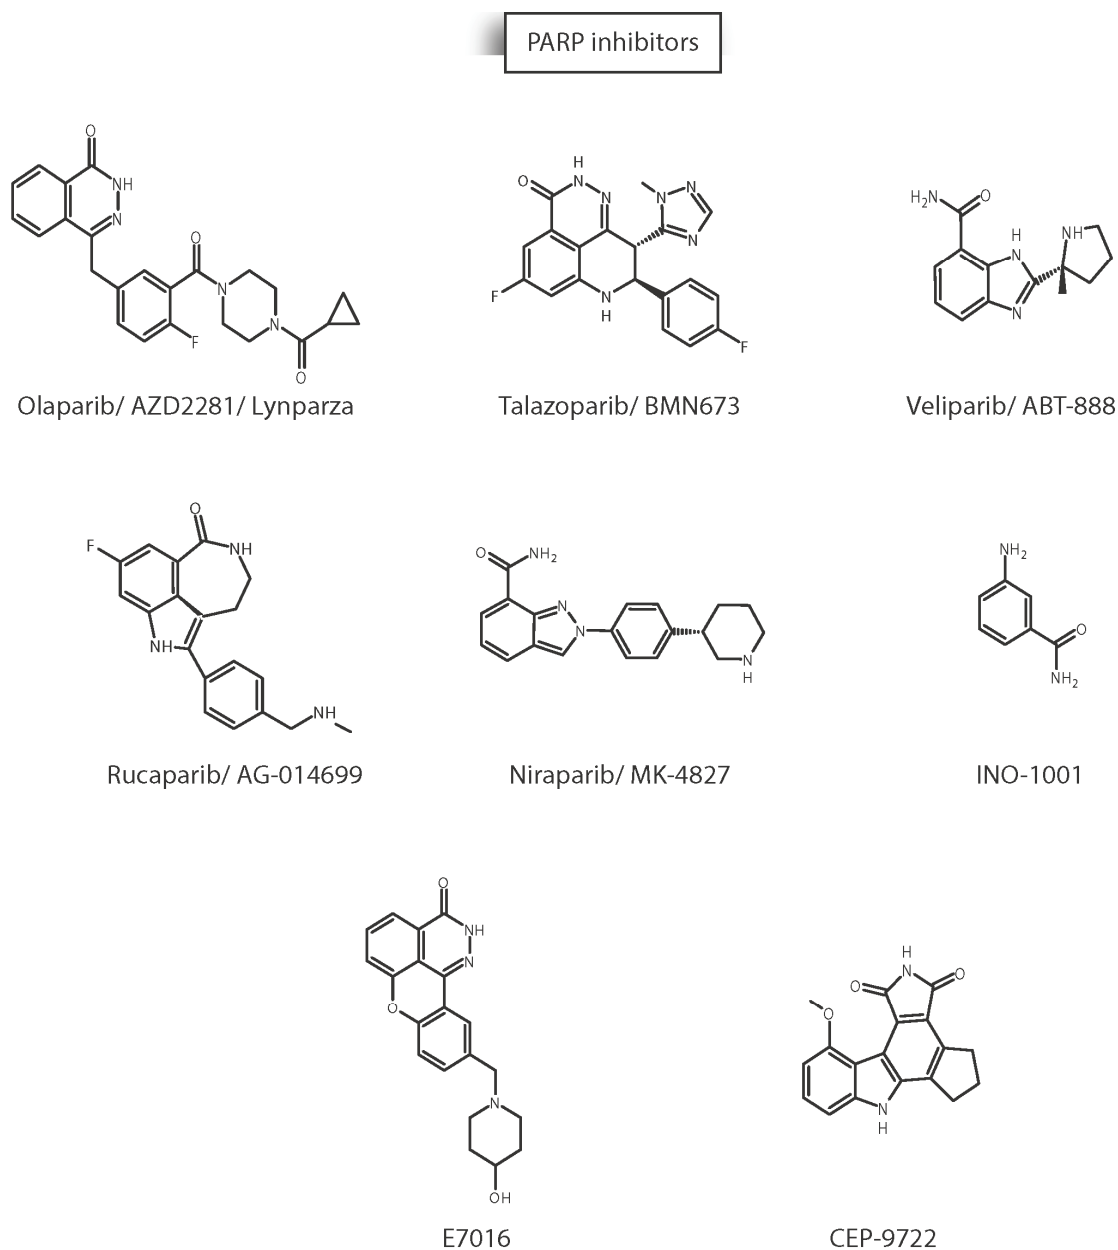

**Figure S3.** PARP inhibitors that have reached clinical evaluation.

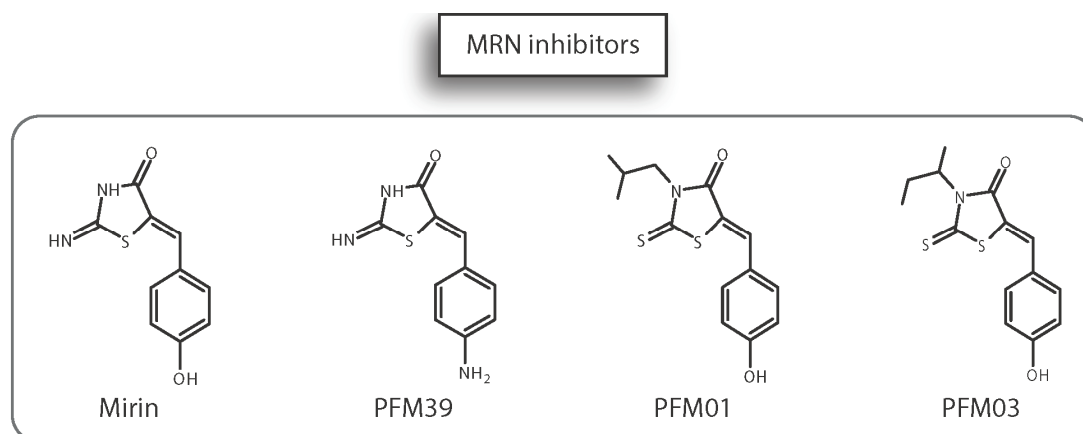

**Figure S4.** MRN (MRE11-RAD50-NBS1) complex inhibitors. Skeletal representation of inhibitors. The grey box designates molecules sharing similarities.

## RAD51 inhibitors

Velic, Couturier et al.

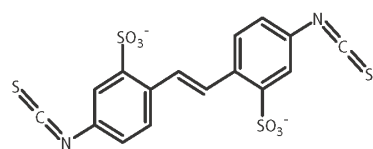

DIDS

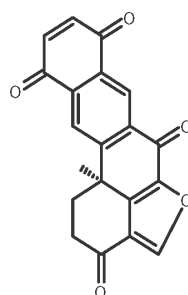

Halenaquinone

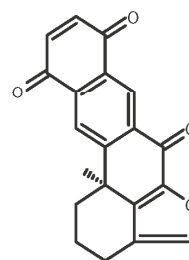

Xestoquinone

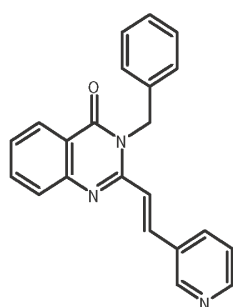

B02

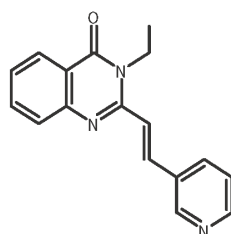

B02-3a

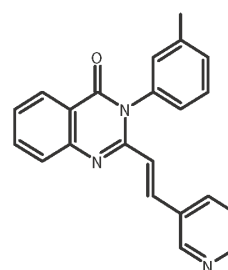

B02-3b

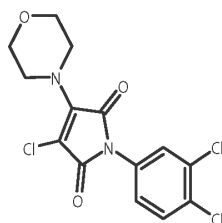

RI-1

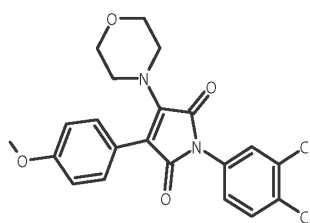

RI-2

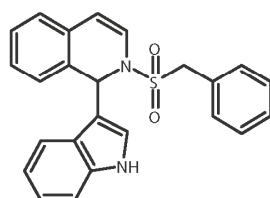

IBR2

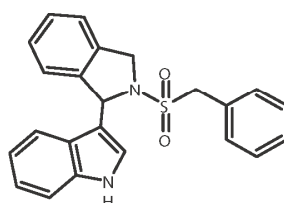

IBR120

**Figure S5.** Skeletal representation of RAD51 inhibitors. Grey boxes designate molecules sharing similarities.

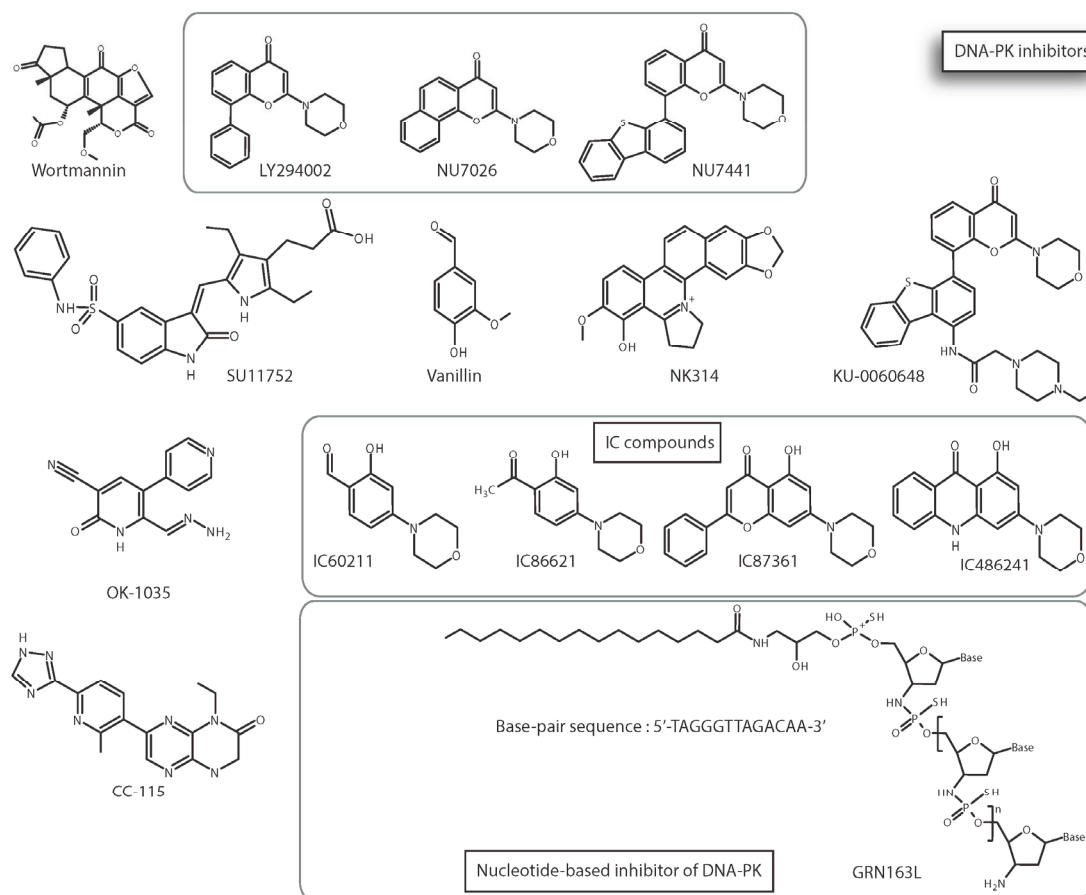

**Figure S6.** Skeletal representation of DNA-PK inhibitors. Grey boxes designate molecules sharing similarities.

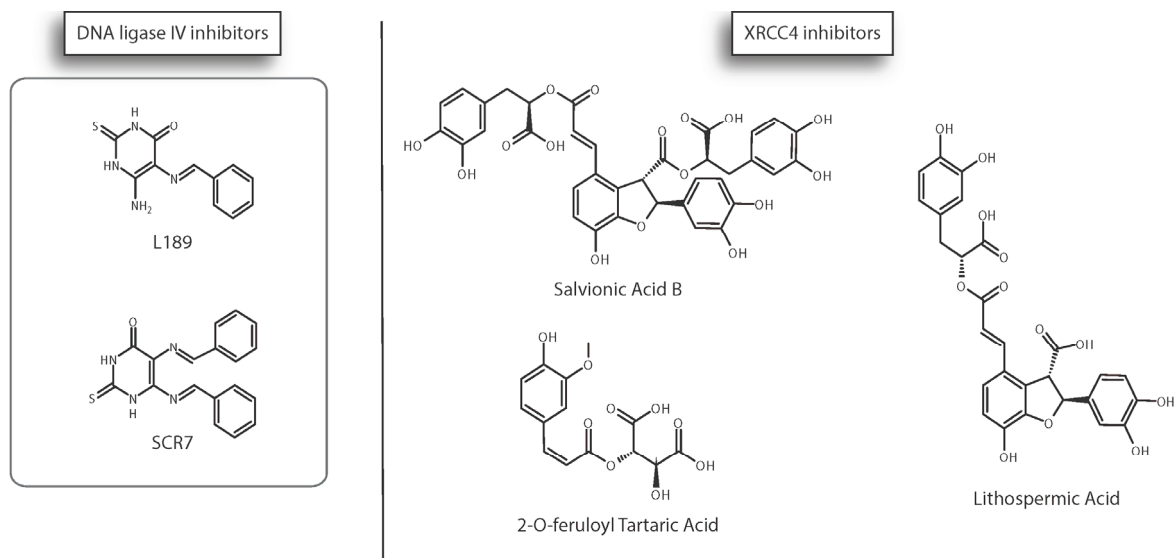

**Figure S7.** DNA ligase IV inhibitors (left) and XRCC4 inhibitors (right). Skeletal representation of inhibitors. Grey boxes designate molecules sharing similarities.
